# Supplementary material for: Chemiluminescent properties of a fluorescent SiC·SiOx composite
Source: Royal Society of Chemistry journal article supplement (doi:10.1039/c6ra14477b), 2016-01-01
Supplement: c6ra14477b1.pdf [file c6ra14477b1.pdf]

## Electronic Supporting Information

### Chemiluminescent properties of fluorescent SiC•SiO<sub>x</sub> composite

Zhen Lin, ‡<sup>\*ab</sup> Namei Wu, ‡<sup>ab</sup> Wensong Yao,<sup>ab</sup> Jinyuan Chen,<sup>ab</sup> Shaoguang Li,<sup>ab</sup> Ailin Liu<sup>ab</sup> and Xinhua Lin<sup>\*ab</sup>

<sup>a</sup>Department of Pharmaceutical Analysis, Faculty of Pharmacy, Fujian Medical University, Fuzhou 350004, China

<sup>b</sup>Nano Medical Technology Research Institute, Fujian Medical University, Fuzhou 350004, China

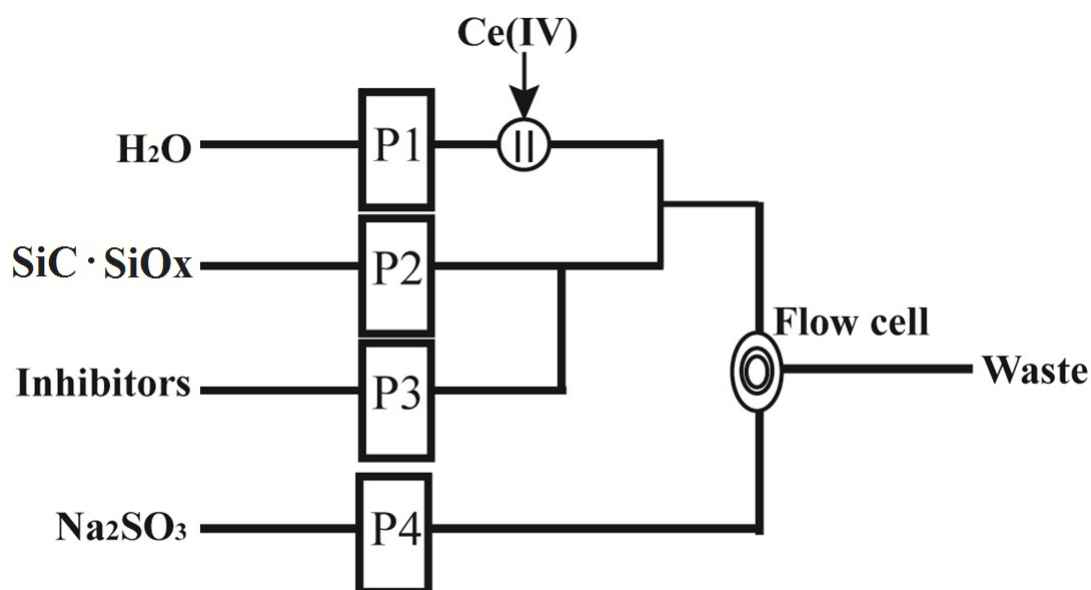

**Fig. S1** Schematic diagram for CL detection by flow-injection system.

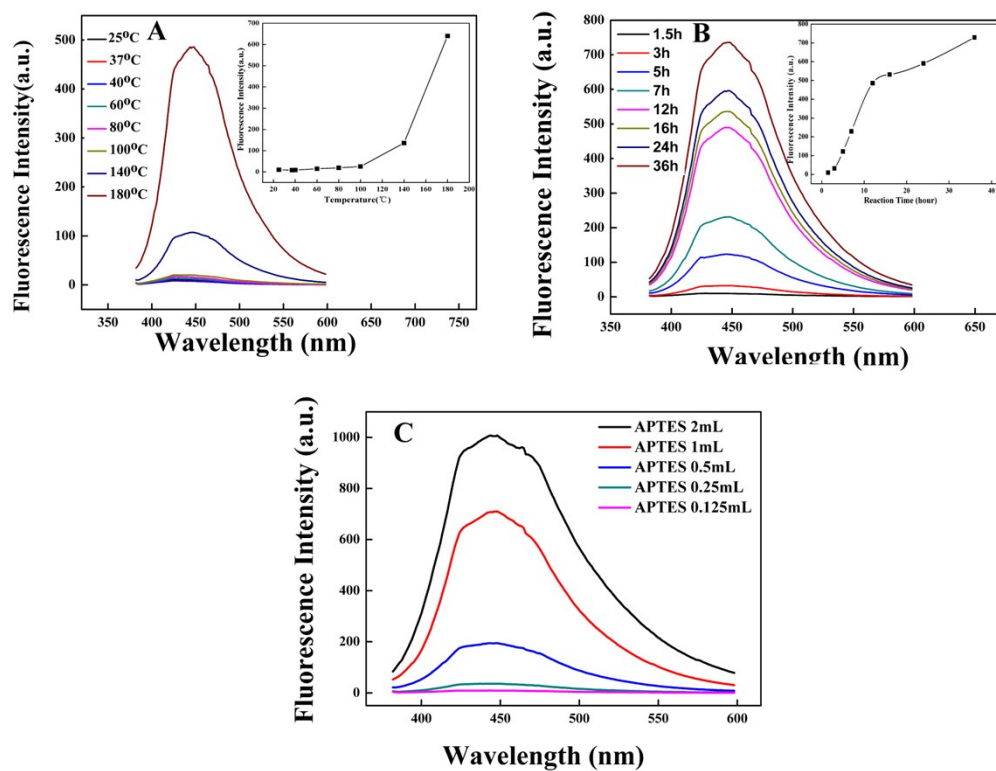

**Fig. S2** The effect of synthesized temperature (A), time (B) and the amount of APTES (C) on the fluorescence intensity of SiC•SiO<sub>x</sub>. The CL intensity were determined by automatic microplate reader (ThermoFisher).

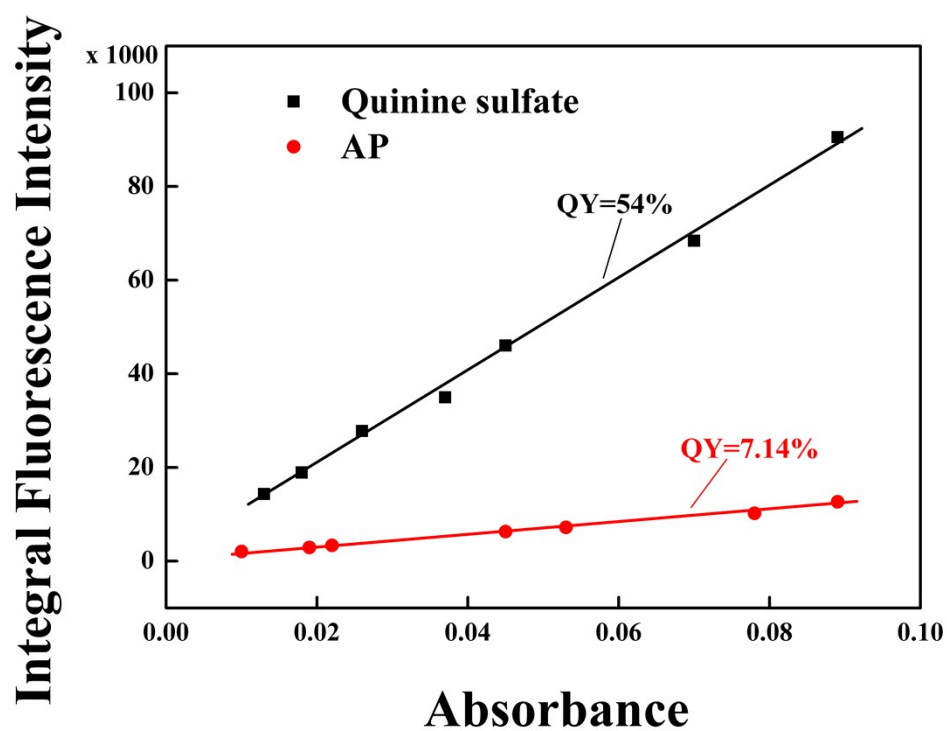

Fig. S3 Fluorescence quantum yield of SiC•SiOx (quinine sulfate was used as reference). The spectra were collected by Hitachi fluorescence spectrophotometer

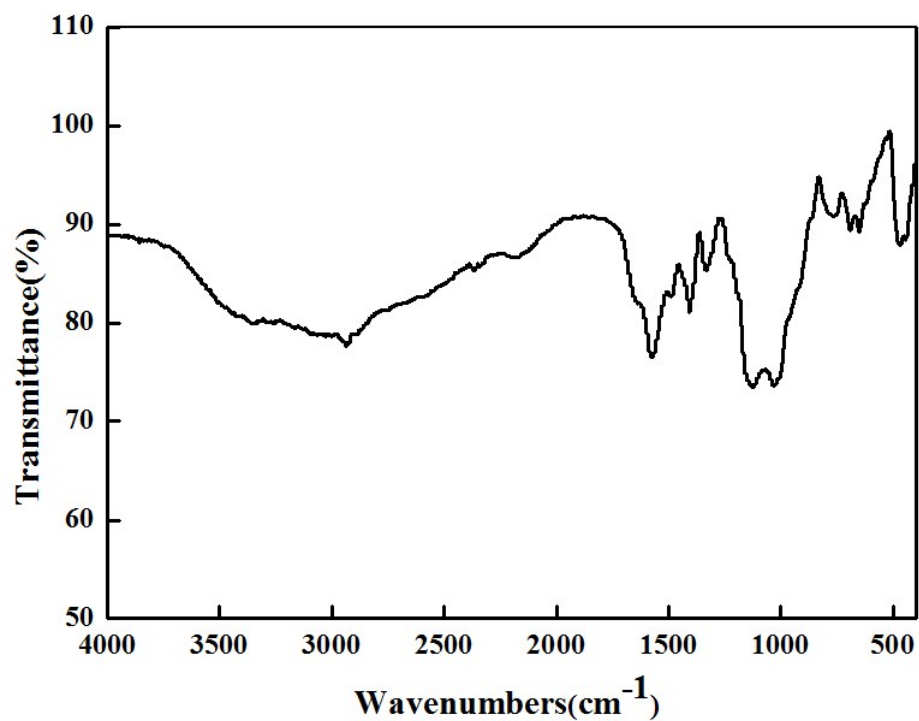

Fig. S4 FTIR spectrum of SiC•SiOx

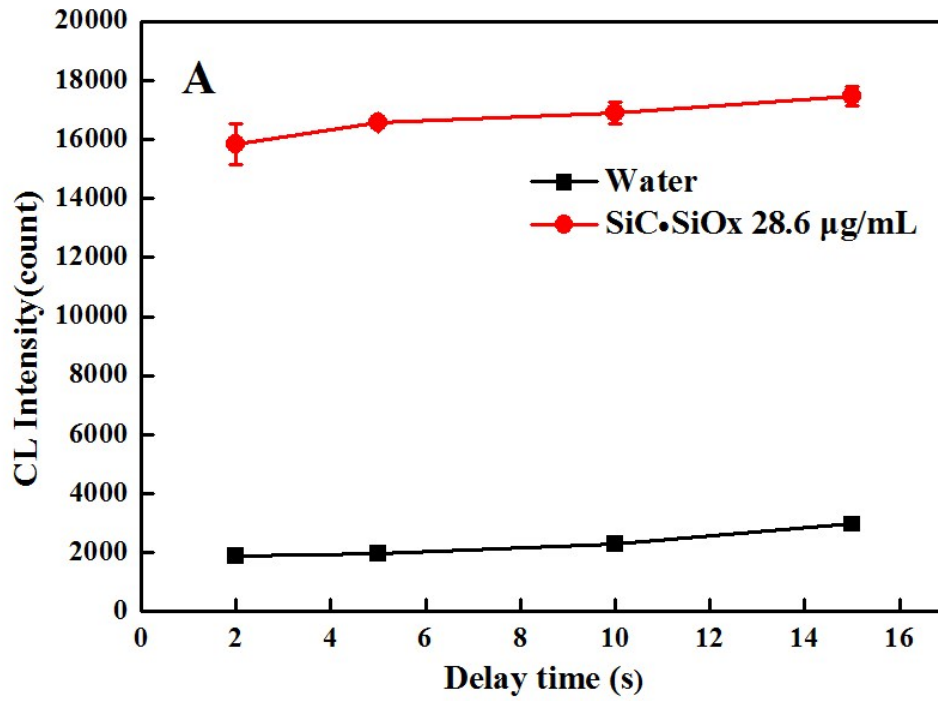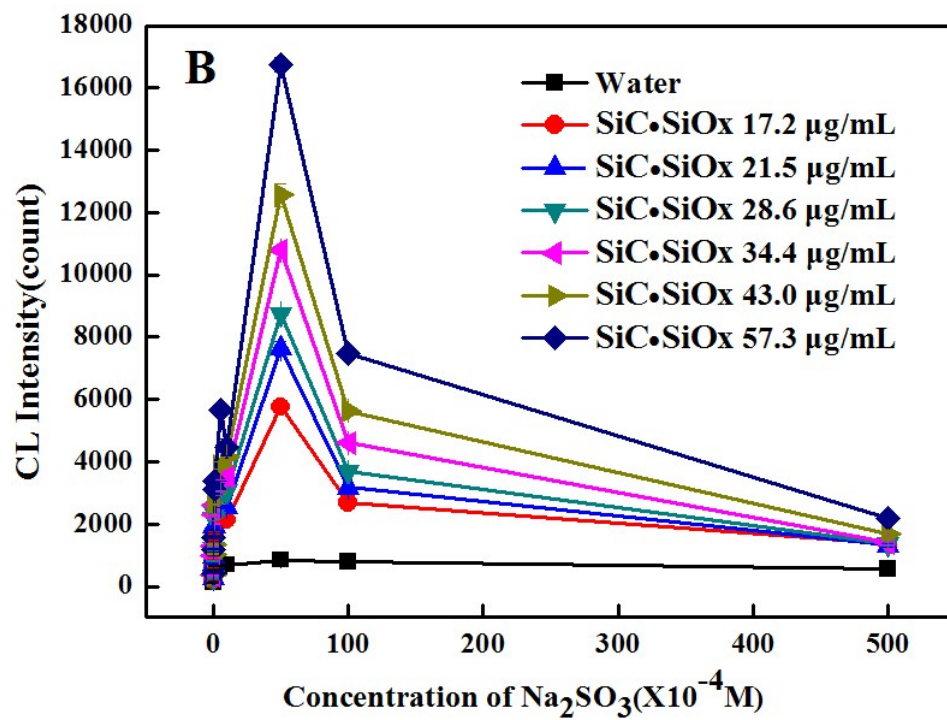

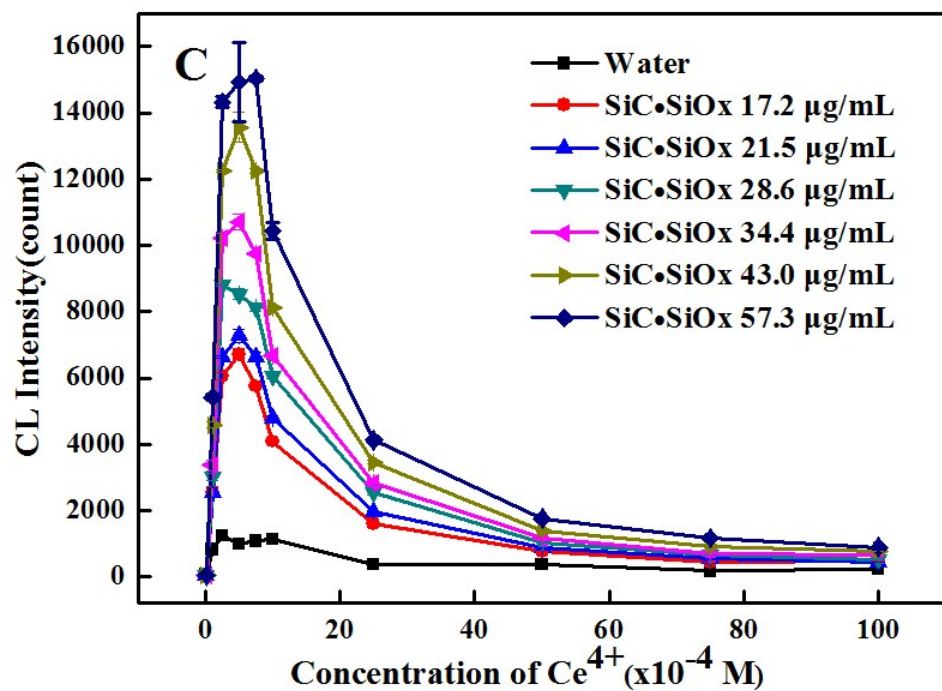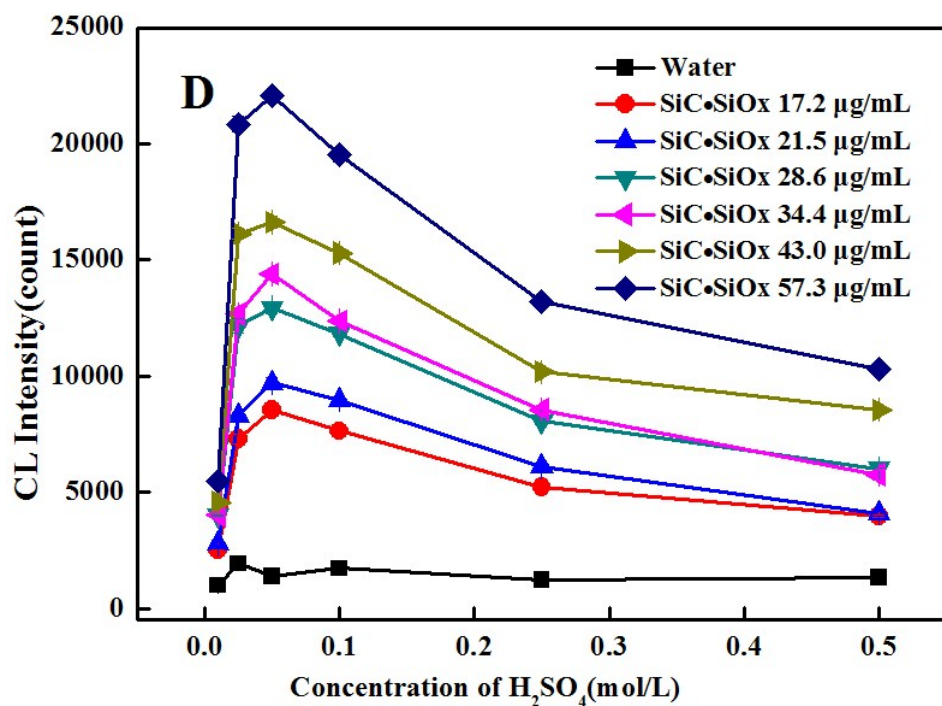

Fig. S5 Reaction time of Ce (IV) with SiC•SiOx (A) and effect of Na<sub>2</sub>SO<sub>3</sub> (B), Ce (IV)(C) and H<sub>2</sub>SO<sub>4</sub>(D) concentration on CL intensity.

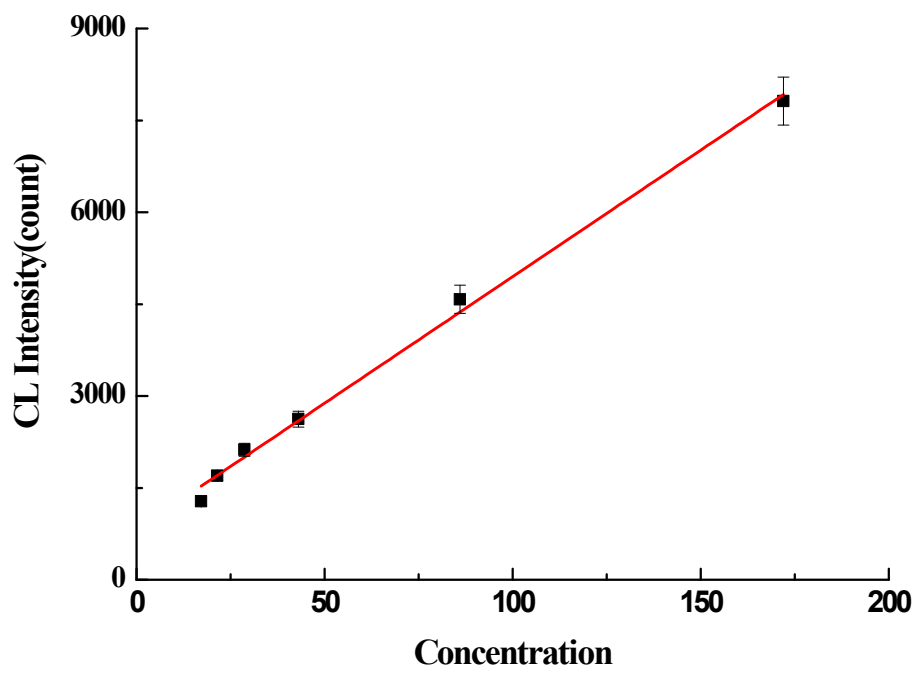

**Fig. S6** The linear relationship between the concentration of SiC•SiOx and the CL intensity

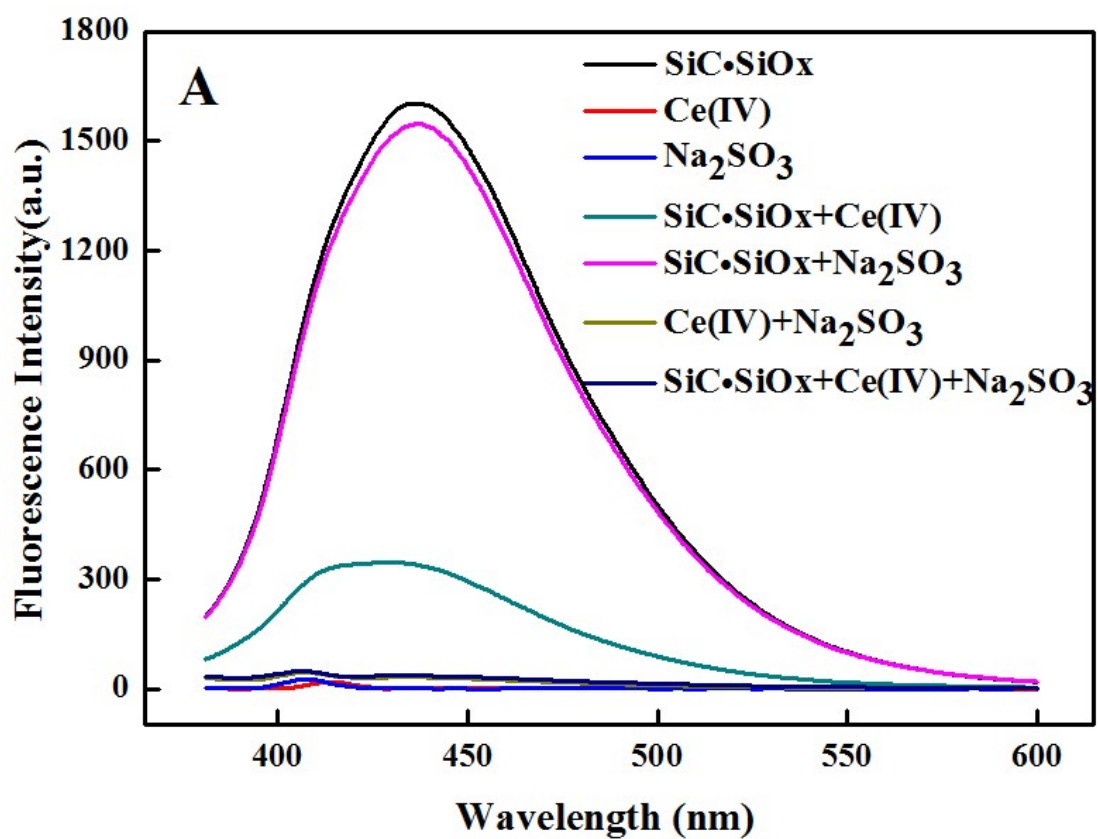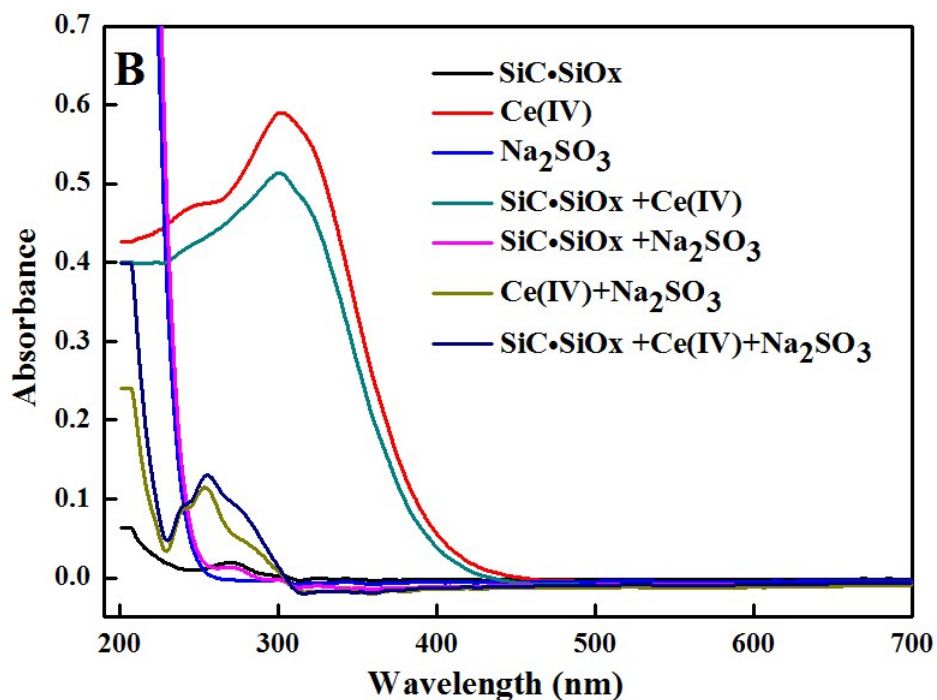

**Fig. S7** Fluorescence(A)and UV (B) spectra of Ce (IV) -Na<sub>2</sub>SO<sub>3</sub>-SiC•SiOx system before and after CL reaction. Experimental conditions:  $5.0 \times 10^{-4}$ mol/L Na<sub>2</sub>SO<sub>3</sub>,  $5.0 \times 10^{-3}$ mol/L Ce (IV) ,

0.05 mol/L  $\text{H}_2\text{SO}_4$  and 858  $\mu\text{g}/\text{mL}$   $\text{SiC}\cdot\text{SiO}_x$ . each reagent used in a combination group was 1mL, and water was added up to a final volume of 3mL.

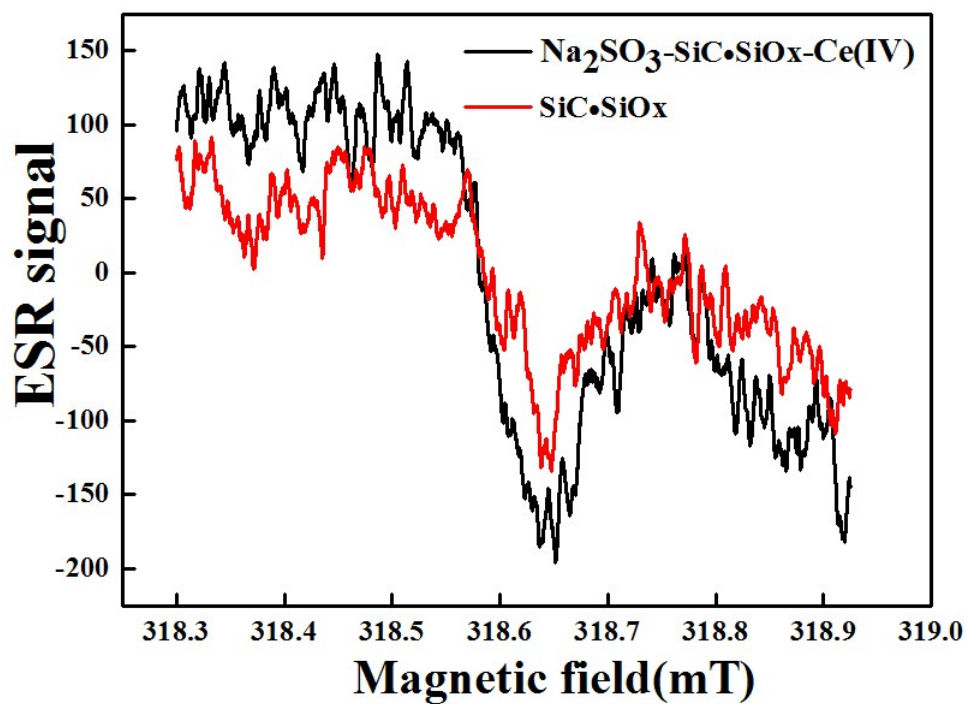

**Fig. S8** ESR spectra of  $\text{SiC}\cdot\text{SiO}_x$  before and after react with  $\text{Na}_2\text{SO}_3\text{-Ce(IV)}$ .



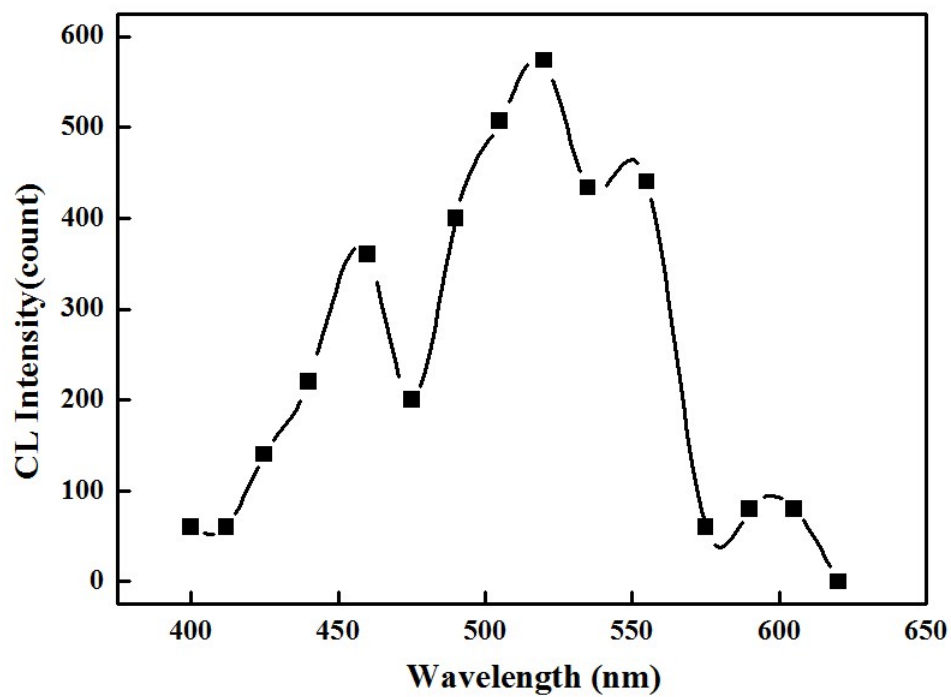

**Fig. S9** CL spectrum of Ce (IV)-Na<sub>2</sub>SO<sub>3</sub>-SiC•SiO<sub>x</sub> system. Flow injection experimental conditions:  $5.0 \times 10^{-3}$  mol/L Na<sub>2</sub>SO<sub>3</sub>,  $1.0 \times 10^{-3}$  mol/L Ce (IV) -0.1 mol /L H<sub>2</sub>SO<sub>4</sub>, 171.6 μg/mL SiC•SiO<sub>x</sub>.

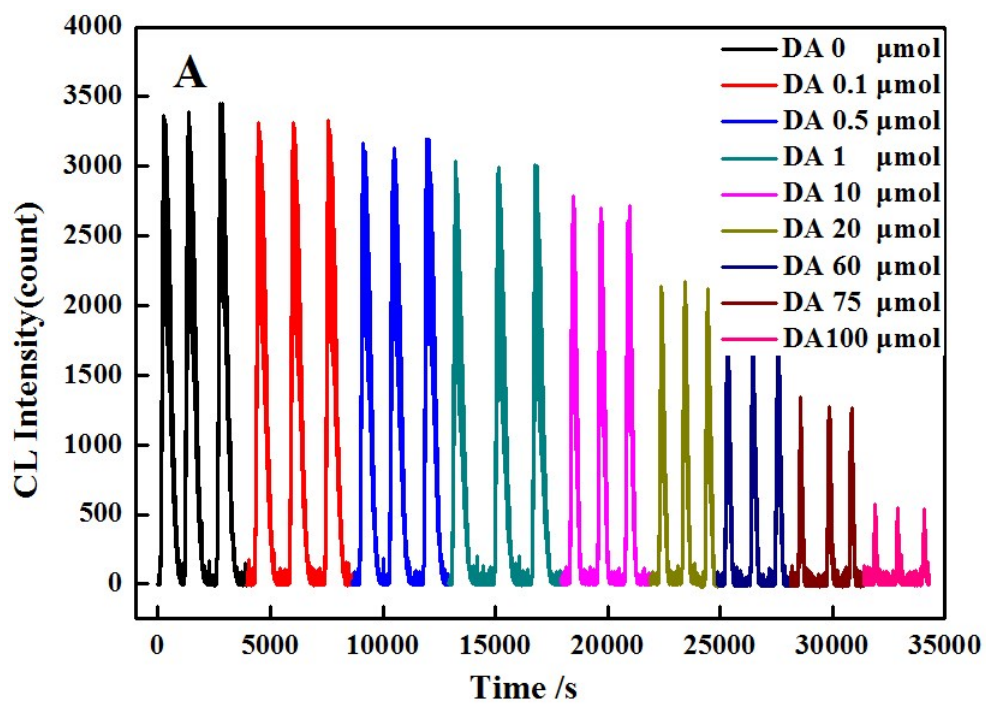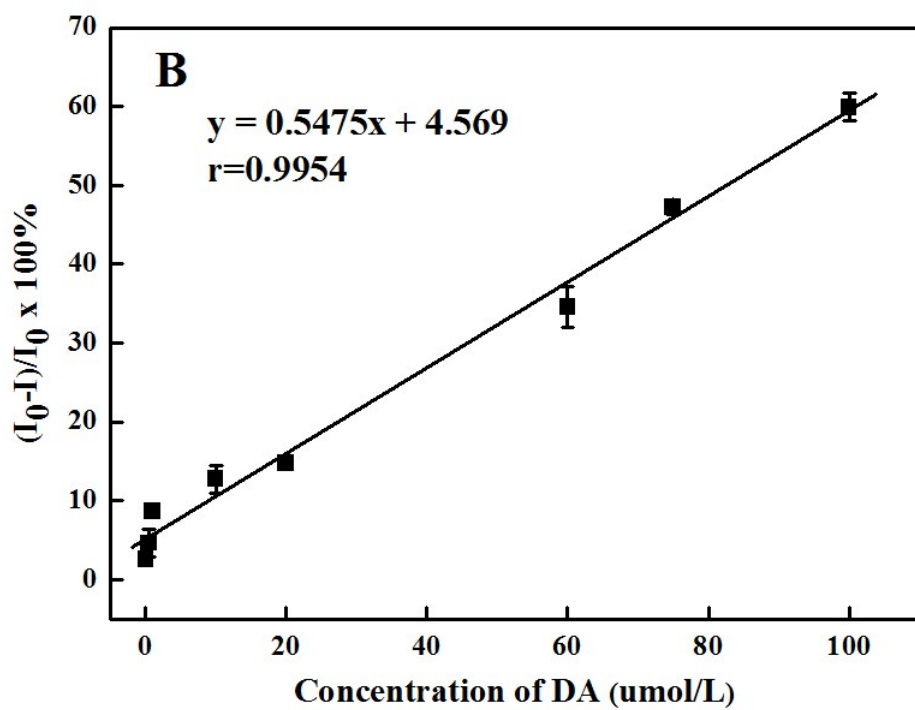

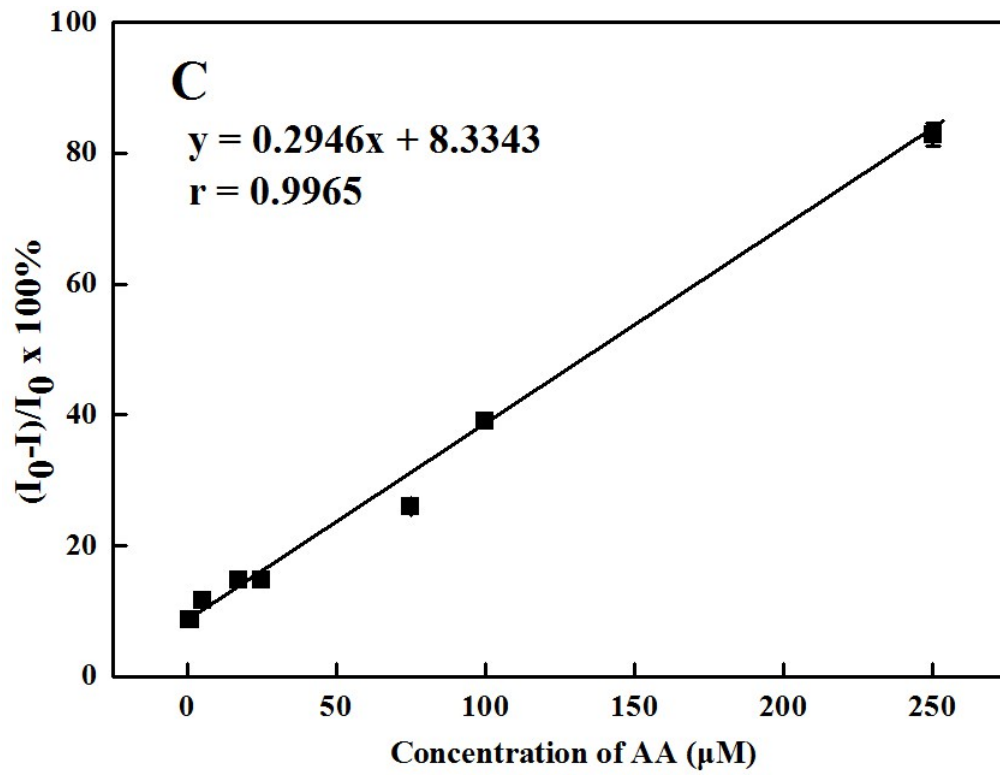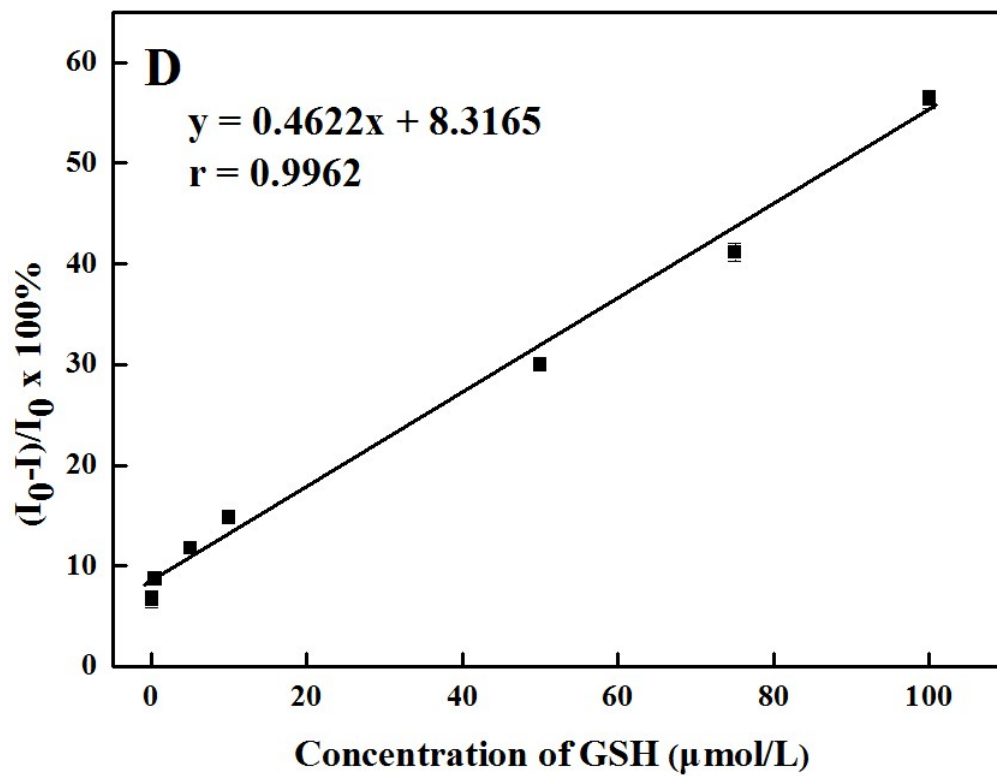

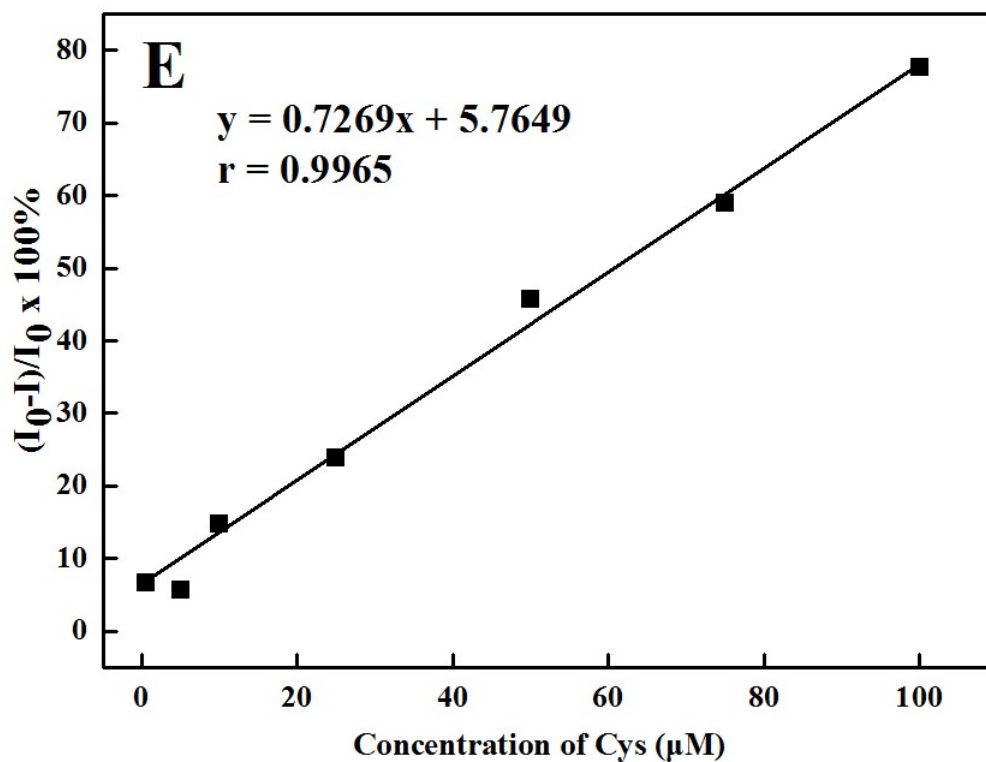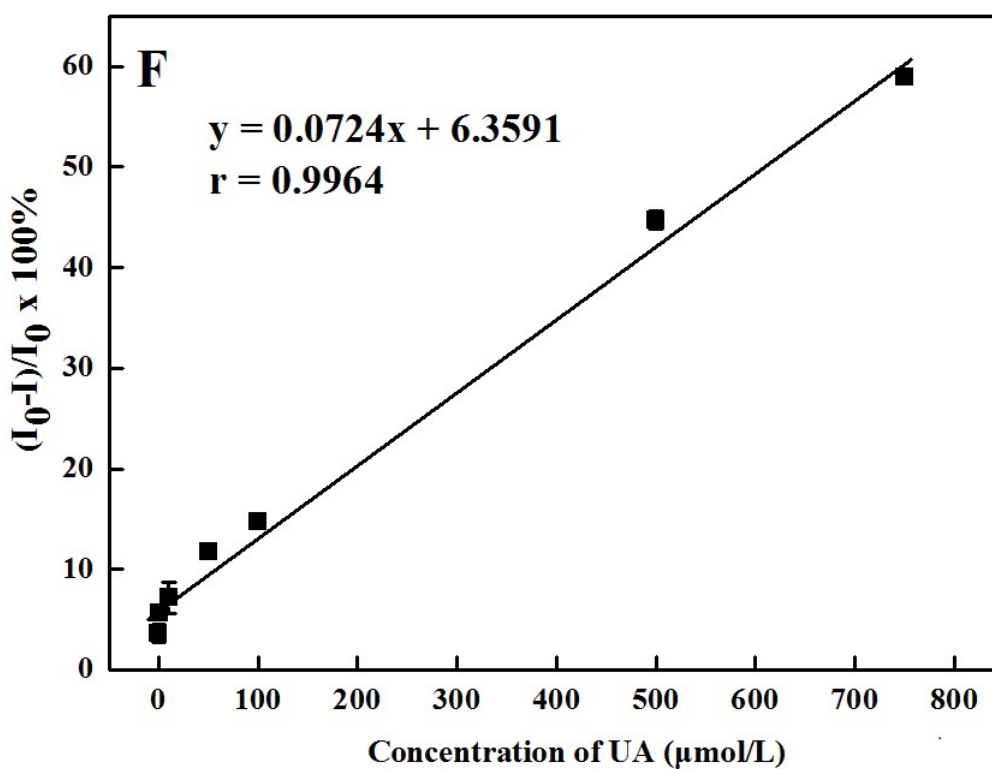

**Fig. S10** The flow injection CL signal diagrams for quantitative analysis of dopamine (A and B) , ascorbic acid (AA) (C), glutathione (GSH) (D), cysteine (Cys)(E) and uric acid (UA)(F) and their standard curves of luminescence inhibition rate vs concentration value.
